# Supplementary material
Source: Research Square preprint supplement (doi:10.21203/rs.3.rs-9654603/v1)
Supplement: Supplementary file 1 [file fc15ef91921b0c35aee52854.docx]

**Supplemental material**

**Supplementary methods**

Dataset creation

A corpus of 100 reference transcripts was constructed from contemporary surgical case-reports indexed in PubMed Central. To identify reports, PubMed Central was searched using the MeSH heading “Surgical Procedures, Operative” combined with a broad set of operative keywords in the title and abstract (e.g., *surg*, *operat*, resection, repair, laparoscop*, anastomos*, graft*, fixation, bypass, stoma, transplant*). Words suggesting novelty (e.g. “rare” “first report”, “novel”) were excluded from the search strategy to focus on case reports detailing generalisable surgical procedures. For each case report, we extracted a single narrative paragraph describing presentation, operative management and early postoperative course. All articles were published under Creative Commons Licenses (CC-BY, CC BY-NC or CC BY-NC-SA) permitting textual reuse for research. These reference transcripts were collated into a reference library, which served as the ground truth for all subsequent transcription accuracy analyses.

Each transcript was narrated by a single individual (RO) in a closed environment using a RODE NT-USB (RØDE, Australia) mini-microphone connected via USB-C to a MacBook Air M3 and recorded in Audacity for Mac (version 3.7.1). Audio files were recorded in [.wav] format at 16-bit depth and 44.1khZ to ensure high audio quality. The recorded audio totalled 4 hours 38 minutes. Each of the (n=100) individual [.wav] audio files were passed through each system under investigation and used to transcribe individual text. To run audio files through the systems, for Heidi-Health and Tortus the [.wav] file was directly uploaded and the resulting word-for-word transcription stored; for Dragon Medical One, a VB-CABLE Virtual Audio Device was used to playback the [.wav] files at 44.1kHz so quality was preserved and the software recognised them as the input. Audio files in [.wav] were run through the APIs of Amazon Medical Transcribe (‘Primary Care, Dictation’), Whisper and GPT4o Transcribe OpenAI, Speechmatics Enhanced. All AVT were used with their default parameters. Transcripts produced by GPT4o Transcribe underwent a large-language-model (LLM) generative error-correction step, with each transcript being sent to the Responses endpoint (v1/responses) of the OpenAI API using the model gpt-5-2025-08-07 (max_tokens=4096).

The full prompt used was ‘You are a helpful assistant for transcribing medical notes. Your task is to carefully read the transcribed text and correct any spelling discrepancies in the transcribed text so that the transcribed text matches with utmost accuracy what the speaker says. All spelling must be in UK English. Only add necessary punctuation such as periods, commas, and capitalisation, and only use the context provided. Never come up with your own details or add information. You will see phonetic substitution errors; these errors must be corrected to the correct medical term. Think carefully about the context when correcting these phonetic substitution errors. Return only the complete, corrected transcript text.’

The text generated from each transcription was collated into Microsoft Excel for Mac (version 16.92) (Microsoft Corp, Burlington, MA, USA) file for subsequent evaluation.

The reference scripts (ground truth) were then compared against the generated texts using Visual Studio Code for Mac (version 1.95, Microsoft Corp, Burlington, MA, USA) with Python (<http://www.python.org/>, version 3.13). The evaluation metrics were calculated using the packages:

pandas (version 2.3.3 <https://pandas.pydata.org>),

torch (version 2.5.1 <https://pytorch.org/>),

transformers (version 4.57.1, <https://github.com/huggingface/transformers>),

rouge_score (version 0.1.2 <https://github.com/google-research/google-research/tree/master/rouge>),

bert_score (version 0.3.13 <https://github.com/Tiiiger/bert_score>),

jiwer (version 3.1.0 <https://github.com/jitsi/jiwer>) and

openpyxl (version 3.1.5 <https://openpyxl.readthedocs.io>).

Error Analysis

Transcription errors identified by the jiwer package during uWER calculation, were categorised using a modified version of Kanal’s error analysis [1]Class 0 errors are formatting errors which are grammatically correct and do not change the meaning of the text; Class 1 errors are grammatically incorrect but do not change the meaning of the text; Class 2 errors produce a change in meaning, but the error is obvious and can be easily identified; Class 3 errors change the meaning in a way that is not obvious upon immediate inspection. Class 3 errors were then categorised according to whether they were a clinically significant error which would lead the reader to misunderstand the clinical meaning as in to potentially impact patient care. [2] Two reviewers (MS and RH) manually annotated errors and assessed the clinical significance of each Class 3 error. Any queries or discrepancies were resolved by a third reviewer (RO). For class 3 errors judged to be clinically significant, errors were then categorised by error domain and potential harm severity. To assess the severity of these errors, considering the plausible consequence if the error was propagated uncorrected and acted upon, severity was rated using a four level scale aligned with NHS England levels of harm. The degree of potential harm was recorded as Level 1 (low), Level 2 (moderate), Level 3 (severe/serious deterioration), or Level 4 (death).[3]

Word Error Rate

WER quantifies transcription accuracy by comparing the number of substitutions, insertions and deletions to the total number of words in the reference transcript.

Where S=number of substitutions; I=insertions; D=deletions; and N=total words in the reference text. Although WER provides an overall measure of performance, it may insufficiently capture domain-specific nuances. The normalised WER is reported.

Domain Word Error Rate

DWER extends WER by focusing on errors associated with specialised terminology, offering a more precise indicator of how effectively an ASR system handles the technical vocabulary required. In this study, we calculated DWER by focusing on tokens from a curated domain-specific vocabulary derived from Systematized Nomenclature of Medicine Clinical Terms SNOMED CT International Edition, English Description snapshot (release 2025-08-01), a structured clinical vocabulary used in electronic health records. DWER provides a more targeted indicator of how effectively an ASR system handles the specialised vocabulary.

Where *Sd=*number of substitutions made on domain tokens; *Id=*number of insertions made on domain tokens; *Dd=*number of deletions made on domain tokens; and *Nd=*total number of domain tokens in the reference text.

Non-Domain Word Error Rate

Non-Domain WER (N-D WER) is computed by excluding all domain-specific terms. This metric evaluates the system performance on general language tokens, providing insight into accuracy outside the specialised terminology.

Where *Snd=*number of substitutions made on non-domain tokens; *Ind=*number of insertions made on non-domain tokens*; Dnd=*number of deletions made on non-domain tokens*;* and *Nnd=*total number of non-domain tokens in the reference text.

Unnormalised Word Error Rate

The unnormalised WER (uWER) is calculated without normalisation, hence penalising formatting differences, such as punctuation variations and alternative transcriptions of numbers (e.g. ‘2’ versus ‘two’ or ‘II’). Consequently, uWER scores tend to be higher than WER scores, a smaller gap between WER and uWER reflects closer adherence to the exact reference formatting.

Character Error Rate

A Character Error Rate (CER) is similar to WER but operates at a finer level of granularity by quantifying transcription errors on a per-character basis rather than per word.

Effect Size

To compare the performance of each tool on domain-specific versus non-domain text, we conducted Wilcoxon signed-rank tests. We then calculated effective sizes (*r*)from the test statistic using the formula:

Where *Z* is the Wilcoxon *z*‐score, and *N* is the total number of observations. A larger *r*‐value indicates greater divergence between domain‐specific and non‐domain performance (i.e. the system struggles more with the clinical terminology relative to general language); whereas a smaller *r*‐value, suggests more consistent performance across both types of content.

Lexical accuracy

The word-level precision of generated transcripts in comparison to the ground truth text was calculated using the ROUGE (Recall-Orientated Understudy for Gisting Evaluation) software package for automatic quantitative evaluation of similarity between two texts [4]. Specifically, within this package ROUGE-1 measures the overlap of unigrams (individual words) between generated text and the reference transcription, ROUGE-2 measures the overlap of bigrams (pairs of consecutive words) and ROUGE-L focuses on the longest common subsequence (LCS) to determine how well the order of words in the generated transcript matches the reference text. An overall ROUGE Score was computed by aggregating ROUGE-1, ROUGE-2 and ROUGE-L.

Semantic similarity

The preservation of meaning and contextual integrity of the generated text in comparison to reference text was calculated using BERT Score and BART Score, two automatic evaluation metrics for text generation. BERT Score computes a similarity score for each token in the candidate sentence with each token in the reference sentence [5].This gives an insight into the token-level alignment between texts; higher scores indicate stronger semantic similarity between the candidate and reference text. In contrast, BART Score employs a pre-trained BART model to estimate the likelihood of a reference given a candidate (and vice versa) [6].This metric captures the overall fluency of the candidate text relative to the reference: higher (or less negative) BART scores suggest that the candidate text is semantically closer to the reference. These evaluation metrics, commonly used in summarisation tasks, provide complementary perspectives on semantic accuracy.

Hallucinations

A manual review of each transcript was undertaken to identify ‘hallucinations’, defined as the introduction of incorrect or misleading information by the ASR system not present in the audio. This was done manually, with the full recording listened to while reading the transcript, flagging any extraneous words or phrases that were not actually spoken. These flagged segments of text were recorded in Microsoft Word for Mac. A hallucination rate was then calculated for each system as the proportion of transcripts containing at least one hallucination relative to the total number of transcripts.

Domain-Term Missed Ratio Analysis

To evaluate performance specifically on what terms are missed, a Domain Term Missed Ratio was calculated. This analysis focused on domain tokens drawn from a dictionary derived from the Systematized Nomenclature of Medicine Clinical Terms structured clinical health terminology product for electronic health records and supplemented with additional terms verified by clinicians in the reference transcripts [7]. Each ASR output was examined to determine whether these tokens (including recognised synonyms) were correctly transcribed. The missed ratio represents the proportion of these domain tokens that were not successfully reproduced by the ASR system, with higher values indicating poorer performance.

Example mistranscriptions were then manually reviewed to highlight specific instances of domain-token errors.

Normalisation

There are multiple equally valid ways to express the same concept in written text; for instance, ‘millimetres’ can appear as ‘mm’ and ‘three out of four’ as ‘3/4’. These superficial variations can inflate error metrics when assessing ASR outputs. To minimise this and ensure fair comparisons across systems, we applied a text-normalisation step to both reference and generated transcripts, focusing on formatting and stylistic differences rather than altering the underlying content, in line with common practice for WER evaluation [8]. Normalisation practices were adapted for the nature of the terms and nomenclature used in surgery. By prioritising consistent transcription of terms, errors were penalised only for genuine mistranscription.

Specifically, normalisation involved converting transcriptions into a standardised format, enabling comparable WER to be calculated across systems. Briefly, steps included case standardisation, converting all text to lowercase and expanding common contractions (informal contractions such as ‘there’s’ were expanded to their full forms, e.g. ‘there is’); numeric formatting, including removing of commas within numbers to standardise numerical expressions and consistent handling of simple number words, fractions and decimals; punctuation consistency, all unnecessary punctuation was removed including periods not followed by digits and apostrophe consistency implemented, unit standardisation, with measurements standardised to abbreviations, such as ‘millimetres’ converted to ‘mm’ and “grams” to “g”.

**Supplementary Table S1 Potential harm severity distribution by AVT system**

|  | **Total (n)** | **Proportion of all clinically significant Class 3 errors (%)** | **Potential harm Level 1 (Low)** | **Potential harm Level 2 (Moderate)** | **Potential harm Level 3 (Severe)** | **Potential harm Level 4 (Death)** | **Severe potential Harm** | **Severe Potential Harm (%)** |
| --- | --- | --- | --- | --- | --- | --- | --- | --- |
| Amazon Medical Transcribe | 122 | 17.9% | 68 | 51 | 3 | 0 | 3 | 2.5% |
| Dragon Medical One | 122 | 17.9% | 70 | 42 | 10 | 0 | 10 | 8.2% |
| Tortus | 114 | 16.7% | 54 | 53 | 6 | 1 | 7 | 6.1% |
| GPT4o Transcribe | 77 | 11.3% | 47 | 29 | 0 | 1 | 1 | 1.3% |
| Speechmatics enhanced | 76 | 11.2% | 39 | 35 | 2 | 0 | 2 | 2.6% |
| Heidi-Health | 70 | 10.3% | 30 | 35 | 5 | 0 | 5 | 7.1% |
| Whisper | 60 | 8.8% | 36 | 18 | 4 | 2 | 6 | 10.0% |
| GPT4oTranscribe Corrected-5 | 40 | 5.9% | 12 | 27 | 1 | 0 | 1 | 2.5% |

Counts show the number of clinically significant Class 3 errors assigned to each potential harm level (Levels 1-4) for each AVT system.

Severe is the combined total of level 3 and level 4 errors.

Proportion of all clinically significant Class 3 errors represents each AVT system’s contribution to clinically significant Class 3 errors across all systems; percentages therefore sum to 100% across ASR systems.

Severe (%) is the percentage of clinically significant Class 3 errors within each AVT system that were rated as severe.

**Supplementary Table S2** Pairwise comparison of AVT systems for word and character error outcomes

|  | **WER** | | **DWER** | | **N-D WER** | | **uWER** | | **CER** | |
| --- | --- | --- | --- | --- | --- | --- | --- | --- | --- | --- |
|  | **b (95% CI)** | **P-value*** | **b (95% CI)** | **P-value*** | **b (95% CI)** | **P*-value** | **b (95% CI)** | **P*-value** | **b (95% CI)** | **P*-value** |
| **GPT4o Transcribe Corrected-5** | Reference |  | Reference |  | Reference |  | Reference |  | Reference |  |
| **Amazon Medical Transcribe** | 10.90  (9.81, 11.99) | <0.001* | 20.15  (18.23, 22.07) | <0.001* | 12.40  (10.98, 13.82) | <0.001* | 22.90  (21.70, 24.10) | <0.001* | 3.60  (3.18, 4.02) | <0.001* |
| **Dragon Medical One** | 8.87  (7.94, 9.80) | <0.001* | 7.05  (5.62, 8.48) | <0.001* | 10.43  (9.44, 11.42) | <0.001* | 20.59  (19.53, 21.65) | <0.001* | 3.41  (3.04, 3.78) | <0.001* |
| **GPT4o Transcribe** | 5.19  (4.21, 6.18) | <0.001* | 15.57  (13.54, 17.60) | <0.001* | 5.48  (4.74, 6.22) | <0.001* | 6.44  (5.29, 7.59) | <0.001* | 1.27  (1.02, 1.52) | <0.001* |
| **Heidi-Health** | 1.37  (0.56, 2.18) | 0.006* | 2.02  (0.65, 3.39) | 0.02* | 1.61  (0.80, 2.42) | <0.001* | 4.43  (3.26, 5.60) | <0.001* | 0.53  (0.21, 0.85) | 0.008* |
| **Speechmatics enhanced** | 5.22  (4.31, 6.13) | <0.001* | 9.45  (7.96, 10.94) | <0.001* | 5.87  (5.02, 6.72) | <0.001* | 13.16  (11.68, 14.64) | <0.001* | 0.93  (0.68, 1.18) | <0.001* |
| **Tortus** | 7.48  (6.44, 8.52) | <0.001* | 15.69  (14.03, 17.35) | <0.001* | 8.51  (7.39, 9.63) | <0.001* | 13.45  (12.44, 14.46) | <0.001* | 2.96  (2.59, 3.33) | <0.001* |
| **Whisper** | 7.63  (6.83, 8.43) | <0.001* | 17.77  (16.01, 19.53) | <0.001* | 8.60  (7.68, 9.52) | <0.001* | 9.37  (8.36, 10.38) | <0.001* | 2.14  (1.86, 2.42) | <0.001* |

b, regression coefficient; CER, character error rate; CI, confidence interval; DWER, domain word error rate; N-DWER, non-domain word error rate; uWER, unnormalised word error rate; WER, word error rate

* Bonferroni correction applied

**Supplementary Table S3** Comparison of different ROUGE metrics by AVT system

|  | **ROUGE-1**  Median  (IQR) | **ROUGE-2**  Median  (IQR) | **ROUGE-L**  Median  (IQR) |
| --- | --- | --- | --- |
| **Amazon Medical Transcribe** | 0.879  (0.857, 0.904) | 0.778  (0.740, 0.819) | 0.876  (0.851, 0.901) |
| **Dragon Medical One** | 0.908  (0.885, 0.925) | 0.808  (0.776, 0.840) | 0.899  (0.880, 0.918) |
| **GPT4o Transcribe** | 0.923  (0.905, 0.943) | 0.854  (0.825, 0.894) | 0.922  (0.904, 0.943) |
| **GPT4o Transcribe Corrected-5** | 0.972  (0.961, 0.980) | 0.943  (0.922, 0.960) | 0.971  (0.959, 0.980) |
| **Heidi-Health** | 0.958  (0.940, 0.971) | 0.915  (0.886, 0.940) | 0.955  (0.937, 0.971) |
| **Speechmatics enhanced** | 0.920  (0.898, 0.939) | 0.854  (0.814, 0.879) | 0.918  (0.894, 0.936) |
| **Tortus** | 0.900  (0.878, 0.913) | 0.809  (0.768, 0.831) | 0.898  (0.873, 0.913) |
| **Whisper** | 0.907  (0.889, 0.921) | 0.827  (0.792, 0.851) | 0.904  (0.885, 0.921) |
| P-value | <0.001* | <0.001* | <0.001* |

* Wald-type test for overall differences from quantile regression

IQR, interquartile range; ROUGE, recall-oriented understudy for gisting evaluation

**Supplementary Table S4** Post hoc pairwise comparison of AVT systems for lexical and semantic outcomes

|  | **ROUGE** | | **ROUGE-1** | | **ROUGE-2** | | **ROUGE-L** | | **BART** | | **BERT** | | |
| --- | --- | --- | --- | --- | --- | --- | --- | --- | --- | --- | --- | --- | --- |
|  | **b (95% CI)** | **P-value*** | **b (95% CI)** | **P-value*** | **b (95% CI)** | **P-value*** | **b (95% CI)** | **P-value*** | **b (95% CI)** | **P-value*** | **b (95% CI)** | **P-value*** |
| **GPT4o Transcribe Corrected-5** | Reference |  | Reference |  | Reference |  | Reference |  | Reference |  | Reference |  |
| **Amazon Medical Transcribe** | -0.12  (-0.13, -0.10) | <0.001* | -0.09  (-0.10, -0.08) | <0.001* | -0.17  (-0.18, -0.15) | <0.001* | -0.10  (-0.11, -0.08) | <0.001* | -0.88  (-0.96, -0.80) | <0.001* | -0.11  (-0.11, -0.10) | <0.001* |
| **Dragon Medical One** | -0.09  (-0.10, -0.08) | <0.001* | -0.06  (-0.07, -0.06) | <0.001* | -0.13  (-0.15, -0.12) | <0.001* | -0.07  (-0.08, -0.06) | <0.001* | -0.63  (-0.70, -0.56) | <0.001* | -0.15  (-0.15, -0.14) | <0.001* |
| **GPT4o Transcribe** | -0.06  (-0.07, -0.06) | <0.001* | -0.05  (-0.05, -0.04) | <0.001* | -0.09  (-0.10, -0.08) | <0.001* | -0.05  (-0.06, -0.04) | <0.001* | -0.41  (-0.46, -0.36) | <0.001* | -0.04  (-0.04, -0.03) | <0.001* |
| **Heidi-Health** | -0.02  (-0.03, -0.01) | <0.001* | -0.01  (-0.02, -0.01) | <0.001* | -0.03  (-0.04, -0.02) | <0.001* | -0.02  (-0.02, -0.01) | <0.001* | -0.10  (-0.14, -0.07) | <0.001* | -0.02  (-0.03, -0.01) | <0.001* |
| **Speechmatics enhanced** | -0.07  (-0.07, -0.06) | <0.001* | -0.05  (-0.06, -0.04) | <0.001* | -0.09  (-0.10, -0.07) | <0.001* | -0.05  (-0.06, -0.04) | <0.001* | -0.32  (-0.37, -0.28) | <0.001* | -0.06  (-0.06, -0.05) | <0.001* |
| **Tortus** | -0.09  (-0.10, -0.09) | <0.001* | -0.07  (-0.08, -0.07) | <0.001* | -0.13  (-0.14, -0.12) | <0.001* | -0.07  (-0.08, -0.07) | <0.001* | -0.62  (-0.66, -0.57) | <0.001* | -0.06  (-0.07, -0.05) | <0.001* |
| **Whisper** | -0.08  (-0.09, -0.08) | <0.001* | -0.07  (-0.07, -0.06) | <0.001* | -0.12  (-0.13, -0.10) | <0.001* | -0.07  (-0.07, -0.06) | <0.001* | -0.60  (-0.66, -0.55) | <0.001* | -0.06  (-0.06, -0.05) | <0.001* |

b, regression coefficient; CER, character error rate; CI, confidence interval; DWER, domain word error rate; N-D WER, non-domain word error rate; uWER, unnormalised word error rate; WER, word error rate

* Bonferroni correction applied.

**Supplementary Table S5 Hallucinations in AVT system-generated text**

| **ASR system** | **Transcript number** | **Reference text (ground truth)** | **Generated text** |
| --- | --- | --- | --- |
| **Whisper** | 11 | … His postoperative course was complicated by an abscess. … | … His post-operative course was complicated by a **therapeutic** abscess. … |
| **Whisper** | 18 | … with concurrent sensory and electrophysiological improvement. … | … with concurrent sensory and electrophysiological improvement. **Thank you for watching**! |
| **Whisper** | 40 | … resolution of the fistula with a clean cavity and healthy granulation tissue. | … resolution of the fistula with a clean cavity and healthy granulation tissue. **For more UN videos visit www.un.org** |
| **Whisper** | 44 | …White cell count 23.3 × 10^9/L, 93% neutrophils; total bilirubin 8.4 mg/dL. Blood cultures yielded Peptostreptococcus micros and he improved with ampicillin/sulbactam... | ..white cell count 23.3. **The patient's blood test showed that he had a high BMI of 16.8 kgm2 and febrile with cholangitis,** white cell count 23.3, 95% neutrophils to bilirubin 8.4. Blood cultures yielded peptostreptococcus micros and he improved with ampicillin, so back down… |
| **Whisper** | 75 | … At her most recent annual follow-up she remained well, with … without further abdominal or shunt-related complications. | … At her most recent annual follow up she remained well with … without further abdominal or shunt related complications**. For more information visit www.fda.gov.au** |
| **Heidi-Health** | 59 | A 68-year-old man attended on 17 May 2022 for a routine health check. … | A 68-year-old man attended on 17/05/2022 for a routine **oral** health check. … |
| **Heidi-Health** | 11 | … His postoperative course was complicated by an abscess. … | … His postoperative course was complicated by a **sympathetic** abscess. … |

This table presents instances where ASR systems produced hallucinations. The table includes the ASR system responsible for the hallucination, transcript number, reference text (representing the ground truth) and generated text (form the ASR system).

Hallucinated text within the generated output is highlighted in bold.

**Supplementary Table S6 Domain-terms, overall domain-term missed ratio and corresponding mistranscriptions across AVT systems**

| **Domain-term** | **Overall domain-term**  **missed ratio (%)** | **Example mistranscriptions** |
| --- | --- | --- |
| Olmesartan | 87.5 | *'omeprazole', 'omesolterin', 'copitagryl', 'omisaltan', 'omnisultran', 'soltan', 'sultan'* |
| Macroscopy | 87.5 | *'microscopic', 'microscopically', 'microscopy'* |
| Hyperparathyroidism | 75 | *'hyperpyrephoretism', 'hyperpyroidism', 'hyperpyrophilism', 'hyperpyrthyroidism', 'hyperthyroidism', 'theroid'* |
| Omentectomy | 62.5 | *'amenectomy', 'aminectomy', 'amy', 'ectomy', 'emendectomy', 'omentoectomy'* |
| Cephalic | 62.5 | *'catholic'* |
| Oestrogen | 50 | *'eastern', 'in eastern'* |
| Paroxysmal | 50 | *'prigsmal', 'prismal', 'proximal', 'primo'* |
| Ischaemia | 62.5 | *'Asemia', 'Asia', 'bile asemia'* |
| Defecography | 87.5 | *'demography', 'free', 'gray', 'main diffractography', 'main diphography'* |
| Fibromatosis | 75 | *'fatsis', 'firmatosis', 'phrymatosis', 'from ptosis'* |
| Phlegmonous | 68.8 | *‘flaminous’, ‘flimonous’, ‘fomon’, ‘fulminant’, ‘fulminous’* |
| Lithiasis | 55 | *'diphthisis', 'diphthysis', 'diphysis', 'lighthiasis'* |
| Papillotomy | 37.5 | *'ablotomy', 'papillomectomy', 'ploy'* |
| Intrathoracic | 37.5 | *'intraforacic', 'intraphrastic'* |
| Hyperthyroidism | 25 | *'hypothyroidism'* |
| Enteroscopy | 25 | *'endoscopy'* |
| Intraluminal | 20.3 | *'interlaminal', 'interliminal', 'interluminal', 'interluminal tumor', 'luminal', 'mineral'* |
| Histology | 8.6 | *'astrology', 'estology'* |
| Extubated | 4.7 | *'executed', 'is excluded'* |
| Creatinine | 12.5 | *'carotene', 'carotenin', 'carotidine', 'curatinine'* |

Overall domain-term missed ratio (%) is the proportion of times a term was mis-transcribed across all AVT systems. A 100% overall missed ratio indicates all ASR systems failed to transcribe the term correctly

**Supplementary Figure S1 Severe clinically significant errors by domain category**. Bars show the number of clinically significant Class 3 errors rated as severe (potential harm level 3) or death (potential harm level 4) within each domain category.


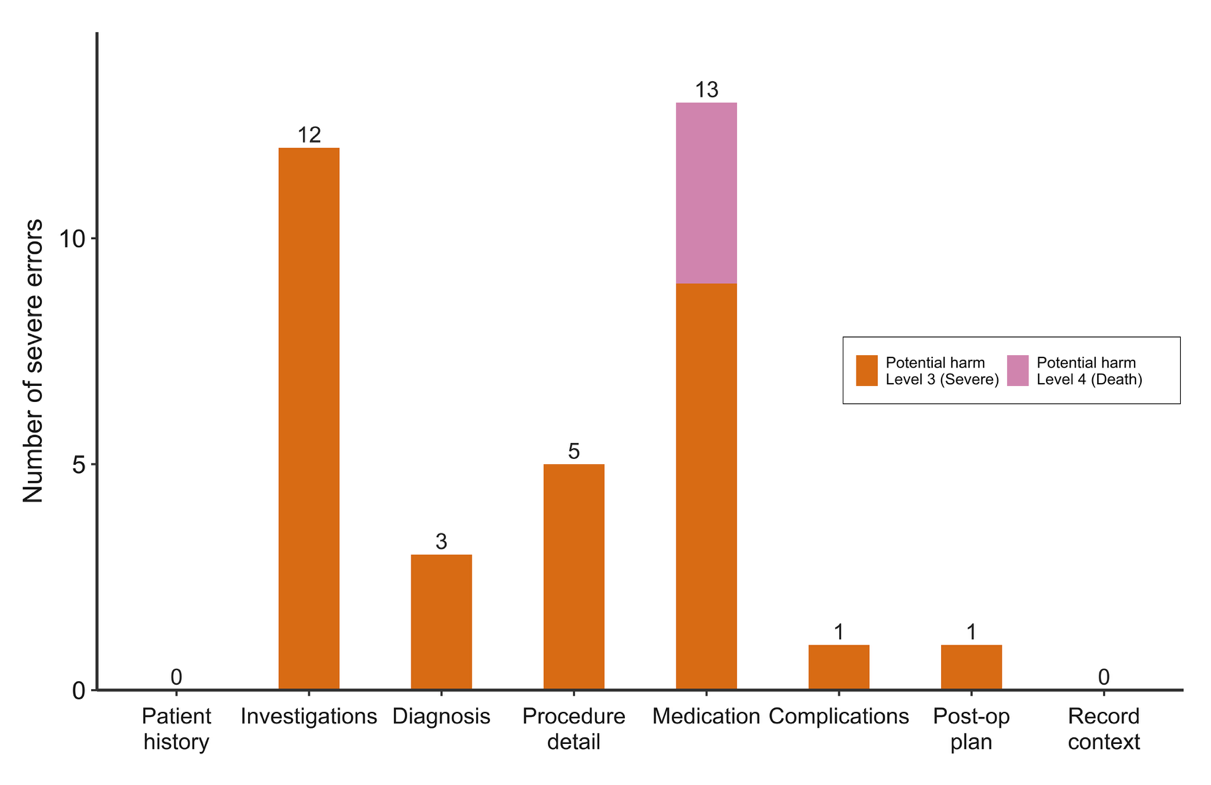


**Supplementary Figure S2 Median DWER versus N-DWER by AVT system.** Bars show the median error rate and whiskers indicate the interquartile range (IQR: 25th-75th percentile).

**
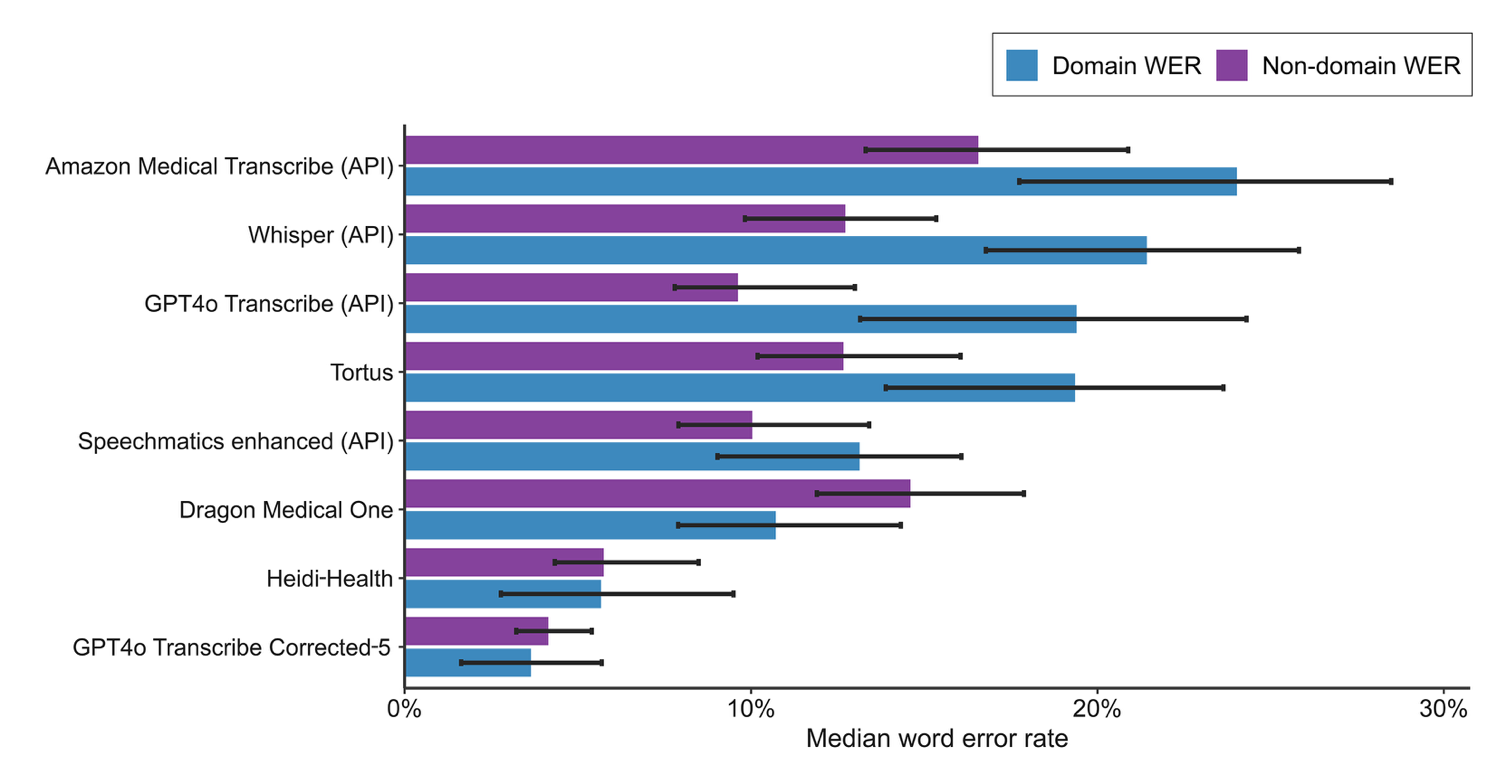
**

**Supplementary Figure S3 Average ROUGE metrics for AVT system tested**

**
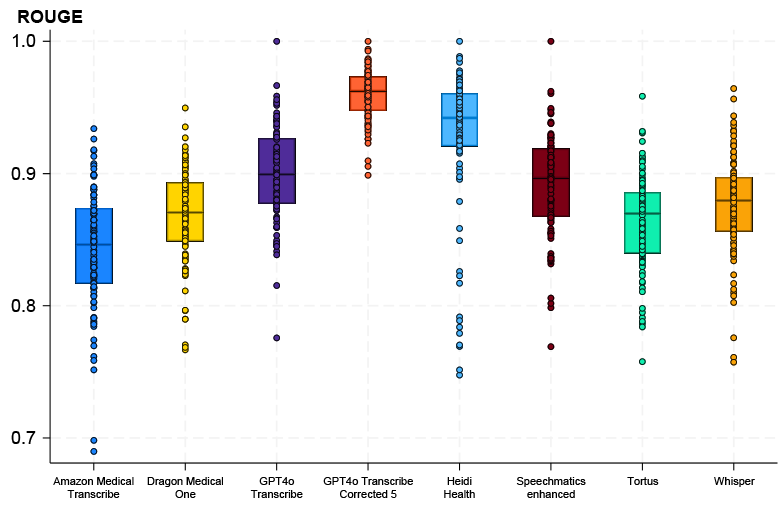
**

**Supplemental references**

1. Kanal, K. M., Hangiandreou, N. J., Sykes, A. M., Eklund, H. E., Araoz, P. A., Leon, J. A., et al. (2001). Initial evaluation of a continuous speech recognition program for radiology. *J Digit Imaging, 14*(1), 30-37, doi:10.1007/s10278-001-0022-z.

2. Chang, C. A., Strahan, R., & Jolley, D. (2011). Non-clinical errors using voice recognition dictation software for radiology reports: a retrospective audit. *J Digit Imaging, 24*(4), 724-728, doi:10.1007/s10278-010-9344-z.

3. NHS England (2024). Policy guidance on recording patient safety events and levels of harm. <https://www.england.nhs.uk/long-read/policy-guidance-on-recording-patient-safety-events-and-levels-of-harm/>. Accessed 14th December 2025.

4. Lin, C.-Y. (2004). ROUGE: A Package for Automatic Evaluation of Summaries. *Association for Computational Linguistics, In: Text Summarization Branches Out*.

5. Zhang, T., Kishore, V., Wu, F., Weinberger, K. Q., & Artzi, Y. (2019). Bertscore: Evaluating text generation with bert. *arXiv, 190409675*.

6. Yuan, W., Neubig, G., & Liu, P. (2021). Bartscore: Evaluating generated text as text generation. *Advances in neural information processing systems, 34*, 27263-27277.

7. NHS Digital (2024). SNOMED CT. <https://digital.nhs.uk/services/terminology-and-classifications/snomed-ct>. Accessed 20 October 2025.

8. Radford, A., Kim, J. W., Xu, T., Brockman, G., McLeavey, C., & Sutskever, I. Robust speech recognition via large-scale weak supervision. In *International conference on machine learning, 2023* (pp. 28492-28518): PMLR
